# Supplementary material
Source: PubMed Central journal article supplement (PMC3463848)
Supplement: emboj2012241s1.pdf [file emboj2012241s1.pdf]

## **Supplementary information**

### **Specific recognition of linear polyubiquitin by A20 zinc finger 7 is involved in NF- $\kappa$ B regulation**

**Fuminori Tokunaga, Hiroshi Nishimasu, Ryuichiro Ishitani, Eiji Goto,  
Takuya Noguchi, Kazuhiro Mio, Kiyoko Kamei, Averil Ma, Kazuhiro Iwai  
and Osamu Nureki**

**This document includes: Supplementary Figures S1–6**

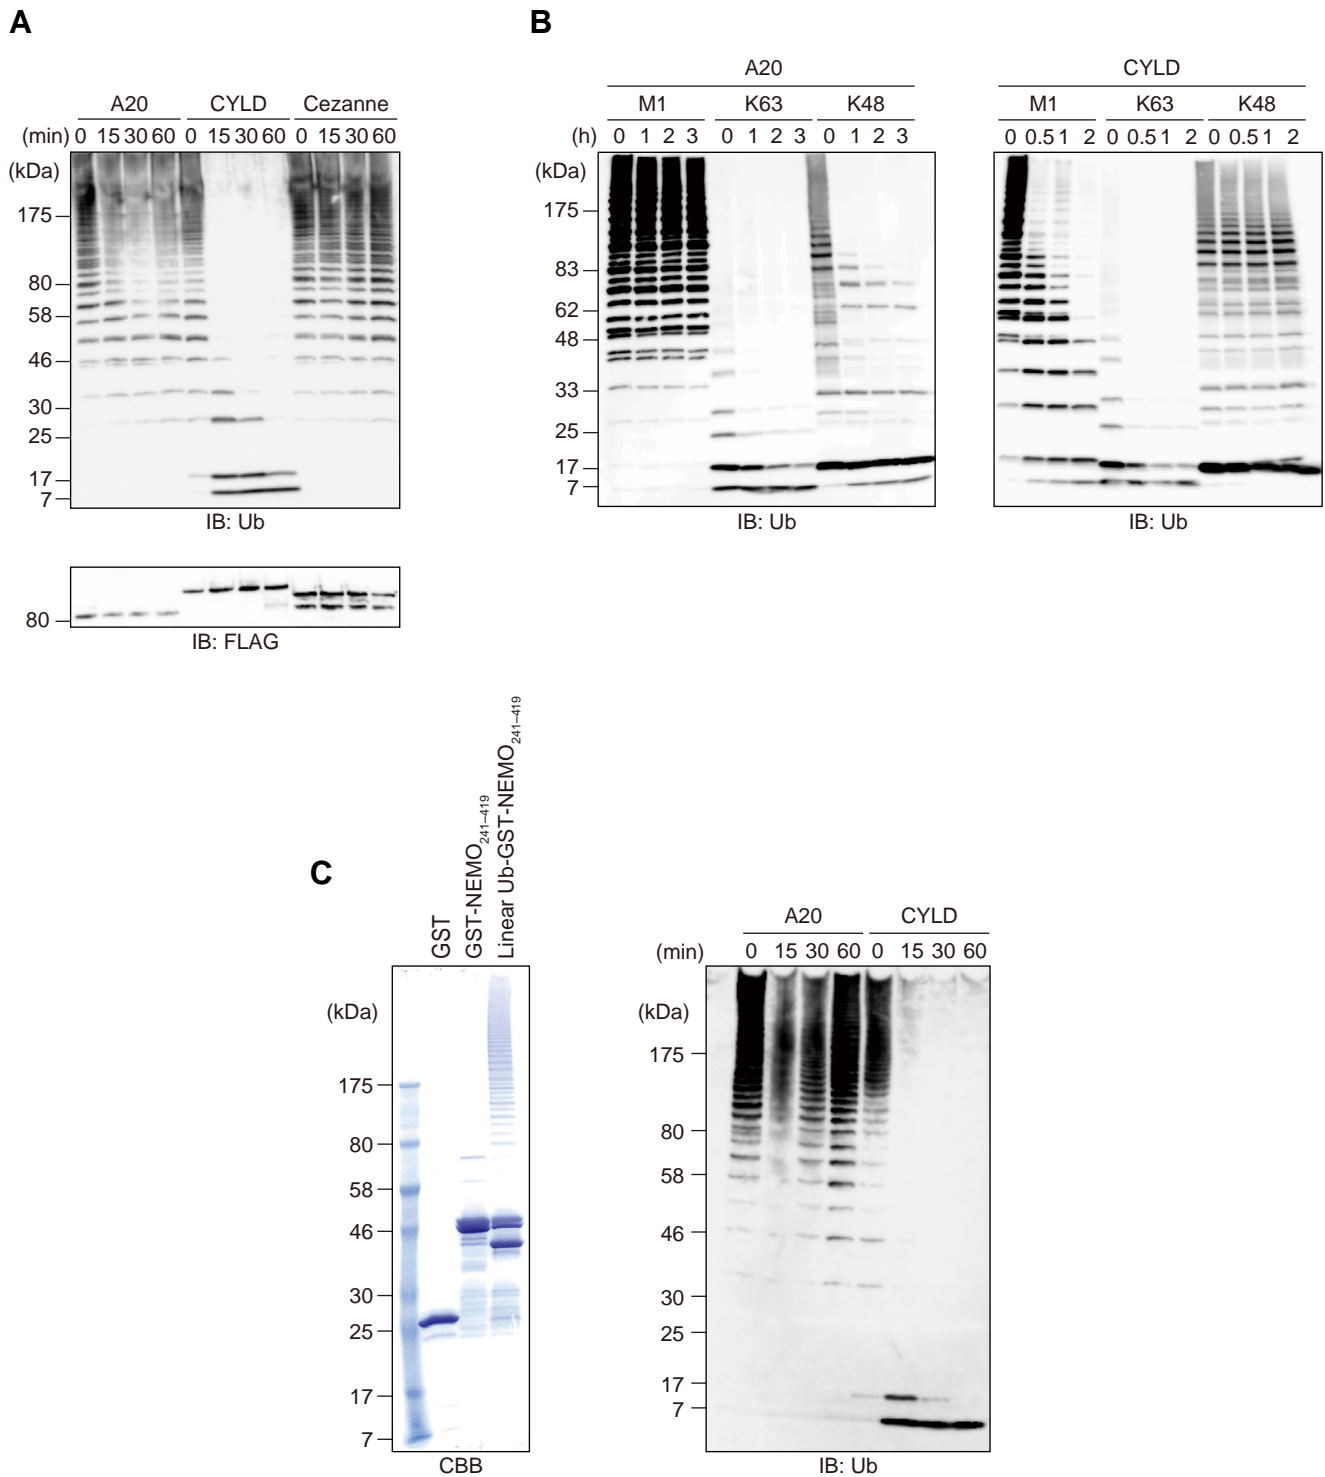

**Supplementary Figure S1** DUB activities of A20, CYLD and Cezanne. **(A)** DUB activities of A20, CYLD and Cezanne for linear polyubiquitin chains. FLAG-tagged A20, CYLD and Cezanne were expressed in HEK293T cells, and the cell lysates were incubated with anti-FLAG beads to capture the proteins. LUBAC-generated linear polyubiquitin chains were reacted with the beads for the indicated times. Linear polyubiquitin degradation was detected by western blotting, using an anti-ubiquitin antibody. **(B)** *In vitro* DUB activities of A20 and CYLD for linear, K63- and K48-linked polyubiquitin chains. Baculovirally expressed recombinant A20 and CYLD were reacted with linear (M1)-, K48- or K63-linked polyubiquitin, and analyzed as in **(A)**. **(C)** DUB activities of A20 and CYLD for NEMO-conjugated linear polyubiquitin chains. The GST-tagged C-terminal region of NEMO (residues 241–419) was linearly ubiquitinated by LUBAC and purified using glutathione Sepharose beads (left panel). DUB activities of A20 and CYLD for NEMO-conjugated linear polyubiquitin chains were examined as in **(A)** (right panel).

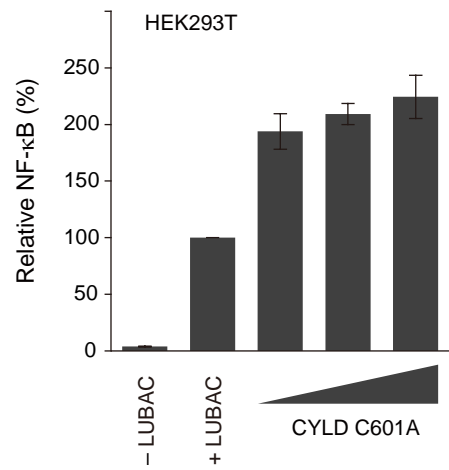

**Supplementary Figure S2** Expression of the catalytically inactive CYLD C601A mutant enhances LUBAC-mediated NF-κB activation. Luciferase reporter assays were performed as in Figure 1B, and the relative luciferase activities are shown as mean  $\pm$  s.d. ( $n = 3$ ).

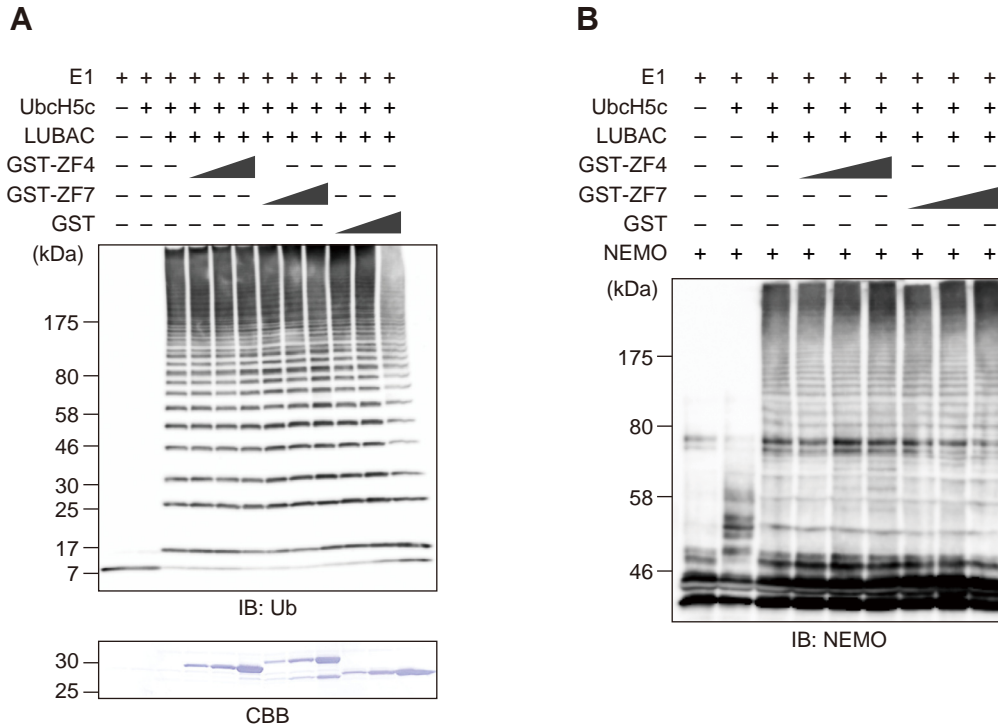

**Supplementary Figure S3** A20 ZF7 does not inhibit LUBAC E3 activity. (**A**, **B**) A20 ZF7 does not inhibit the LUBAC-catalysed generation of either free linear polyubiquitin (**A**) or NEMO-conjugated linear polyubiquitin (**B**). *In vitro* ubiquitination experiments were performed using E1 (100 ng), UbcH5c (200 ng), recombinant LUBAC (1  $\mu$ g) and increasing amounts of GST proteins (0.3, 1, 3  $\mu$ g), in the absence (**A**) and presence (**B**) of recombinant FLAG-His6-tagged full-length human NEMO. Polyubiquitin chains were detected by western blotting, using the indicated antibodies.

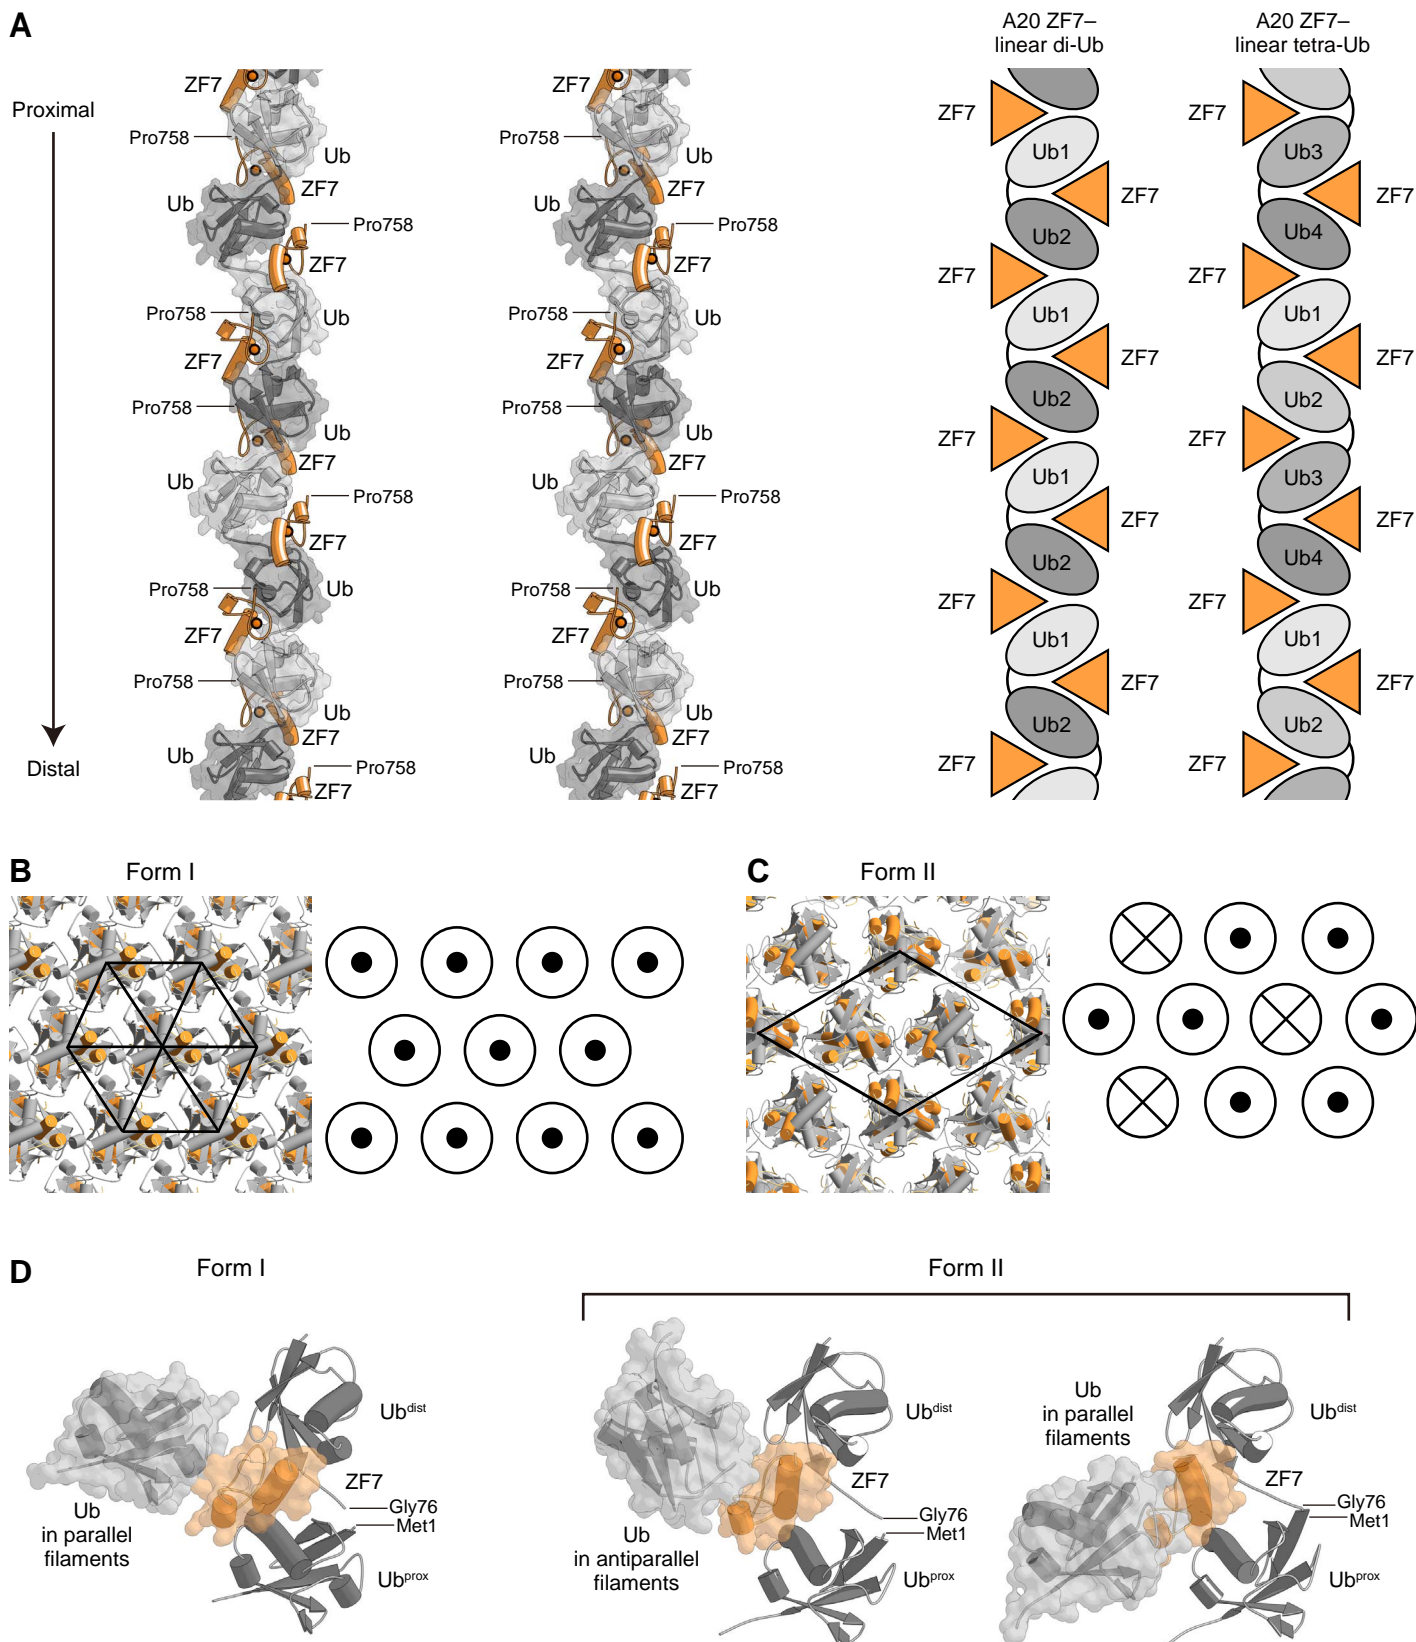

**Supplementary Figure S4** Two types of crystal packing of A20 ZF7 in complex with linear ubiquitin chains. **(A)** In both Forms I and II, A20 ZF7 (orange) molecules intercalate between each pair of two adjacent ubiquitin molecules (grey) in the same manner, forming a straight, filamentous structure (stereoview). The N-terminal Pro758 of A20 ZF7 projects outward from the filamentous structure, suggesting that full-length A20 can bind linear polyubiquitin in a manner similar to that of A20 ZF7 alone. The schematic drawings show the crystal packing in the diubiquitin and tetraubiquitin complexes. **(B, C)** All of the filaments formed by A20 ZF7 (orange) and ubiquitin (grey) molecules run parallel in Form I **(B)**, whereas one filament is surrounded by six filaments that run antiparallel to it in Form II **(C)**. The filamentous structures run perpendicular to the paper, and the unit cells are indicated by black lines. **(D)** A20 ZF7 (orange) interacts with three and four adjacent ubiquitin molecules (grey) in Forms I and II, respectively. Forms I and II commonly contain one A20 ZF7-linear diubiquitin complex with a virtually identical conformation.

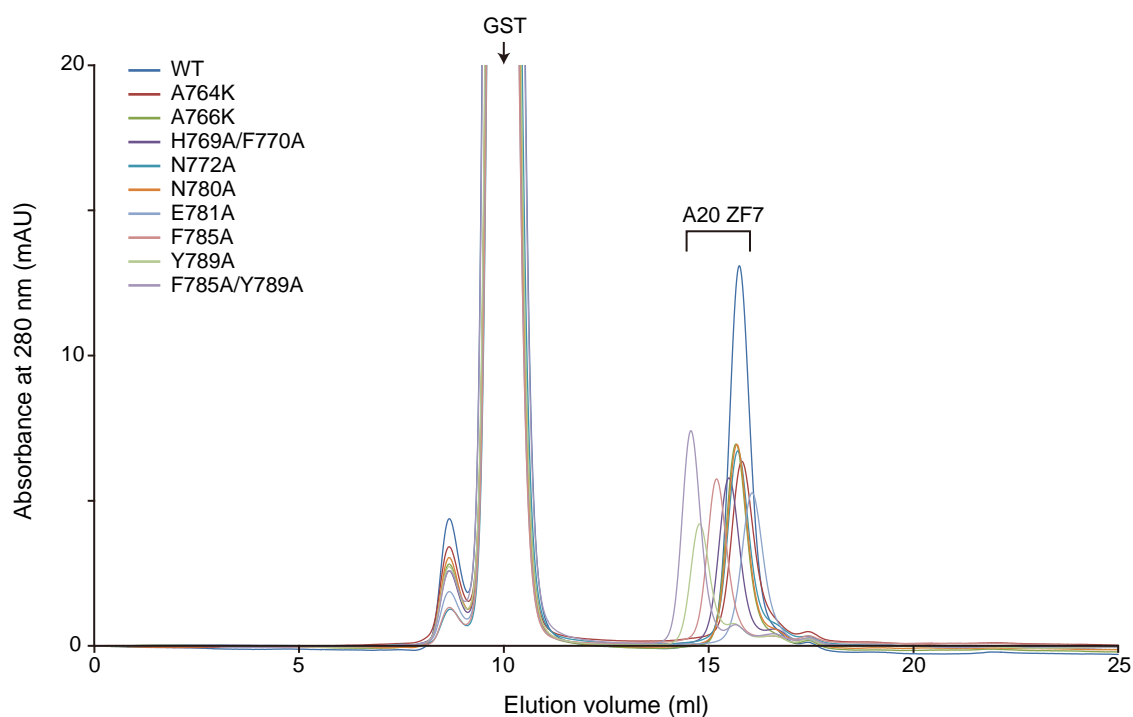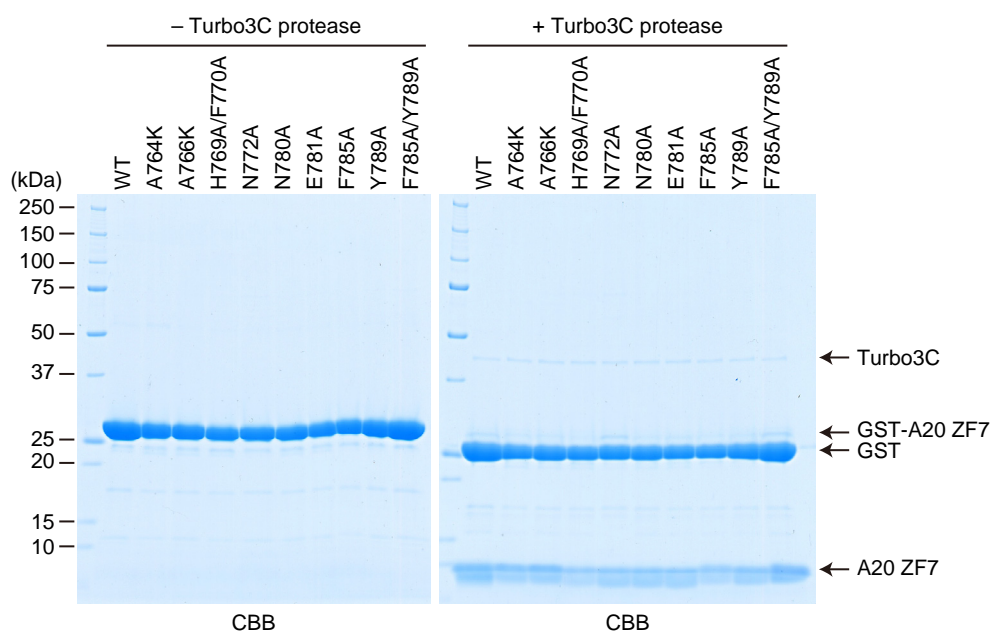

**Supplementary Figure S5** Size-exclusion chromatography of WT and mutants of A20 ZF7. GST-tagged A20 ZF7 proteins were expressed in *E. coli* and purified by glutathione Sepharose chromatography. The purified GST-tagged A20 ZF7 proteins (0.1 mg) were treated with Turbo3C protease (0.6  $\mu$ g) (Nacalai Tesque) overnight at 4°C to cleave the GST-tag, and then were analyzed by size-exclusion chromatography on a Superdex75 10/300 column (GE Healthcare), equilibrated with PBS buffer supplemented with 1 mM TCEP. The proteins before and after the protease treatment were analyzed by 10–20% SDS-PAGE, and stained with SimplyBlue SafeStain (Invitrogen).

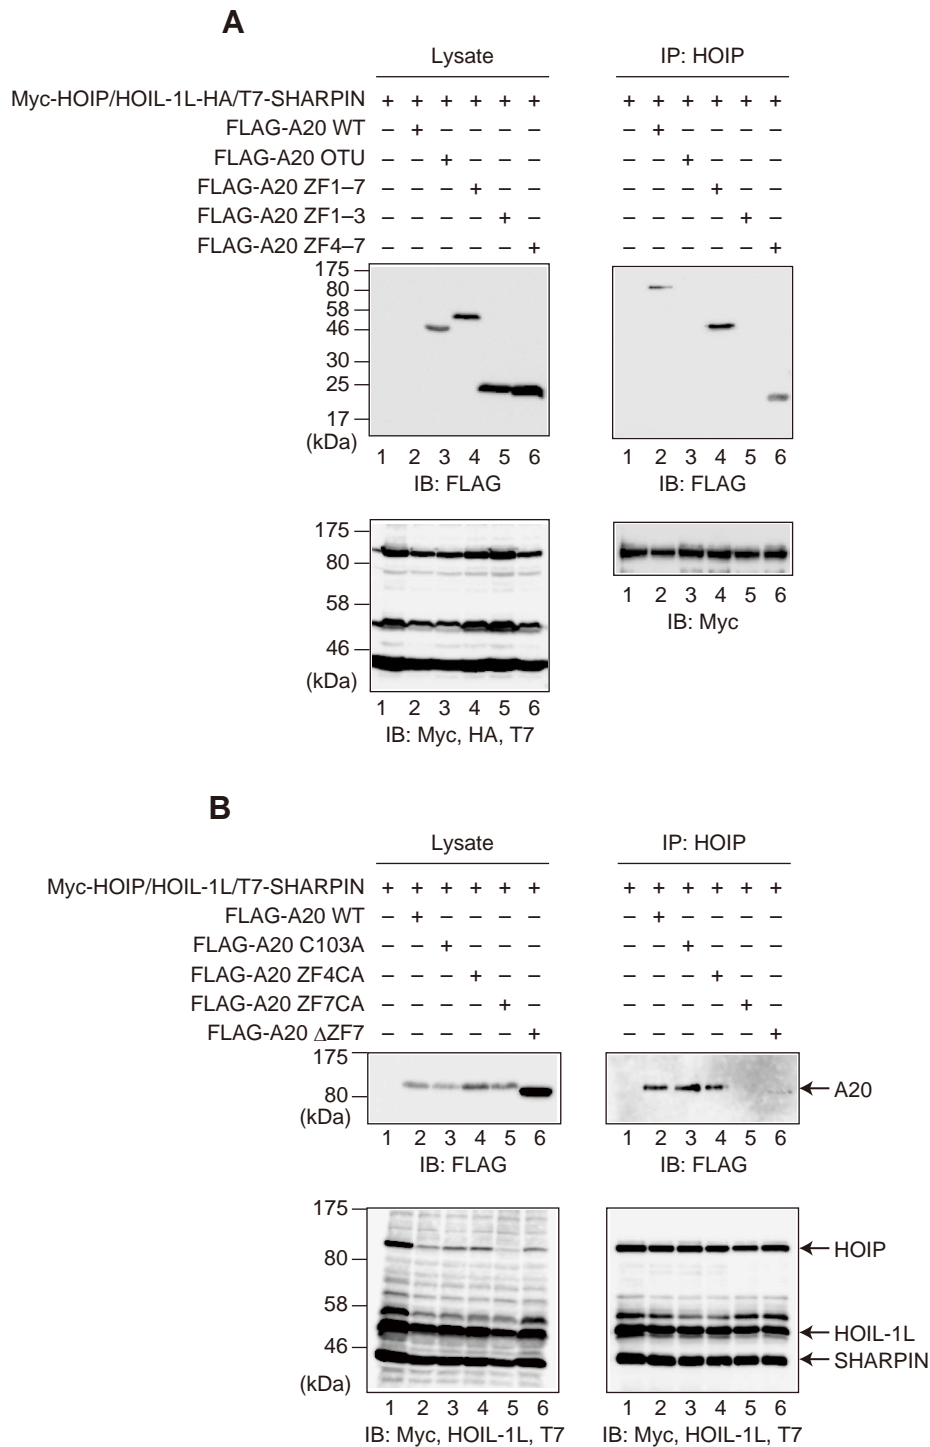

**Supplementary Figure S6** A20 ZF7 is crucial for association with LUBAC. **(A)** A20 ZF4-7 participates in the association with LUBAC. **(B)** Intact A20 ZF7 is required for the association with LUBAC. Cell lysates and immunoprecipitates from HEK293T cells expressing the indicated proteins were detected by western blotting, using the indicated antibodies **(A and B)**.
